# Supplementary material for: Atomically precise silver clusters for efficient chlorocarbon degradation
Source: Royal Society of Chemistry journal article supplement (doi:10.1039/c2ta00254j), 2012-10-15
Supplement: c2ta00254j.pdf [file c2ta00254j.pdf]

## Electronic supplementary information

# Atomically precise silver clusters for efficient chlorocarbon degradation

M. S. Bootharaju,<sup>a</sup> G. K. Deepesh,<sup>a</sup> T. Udayabhaskararao and T. Pradeep\*

*DST Unit of Nanoscience (DST UNS), Department of Chemistry,*

*Indian Institute of Technology Madras, Chennai - 600 036, India*

\*E-mail: [pradeep@iitm.ac.in](mailto:pradeep@iitm.ac.in)

<sup>a</sup>These authors have contributed equally

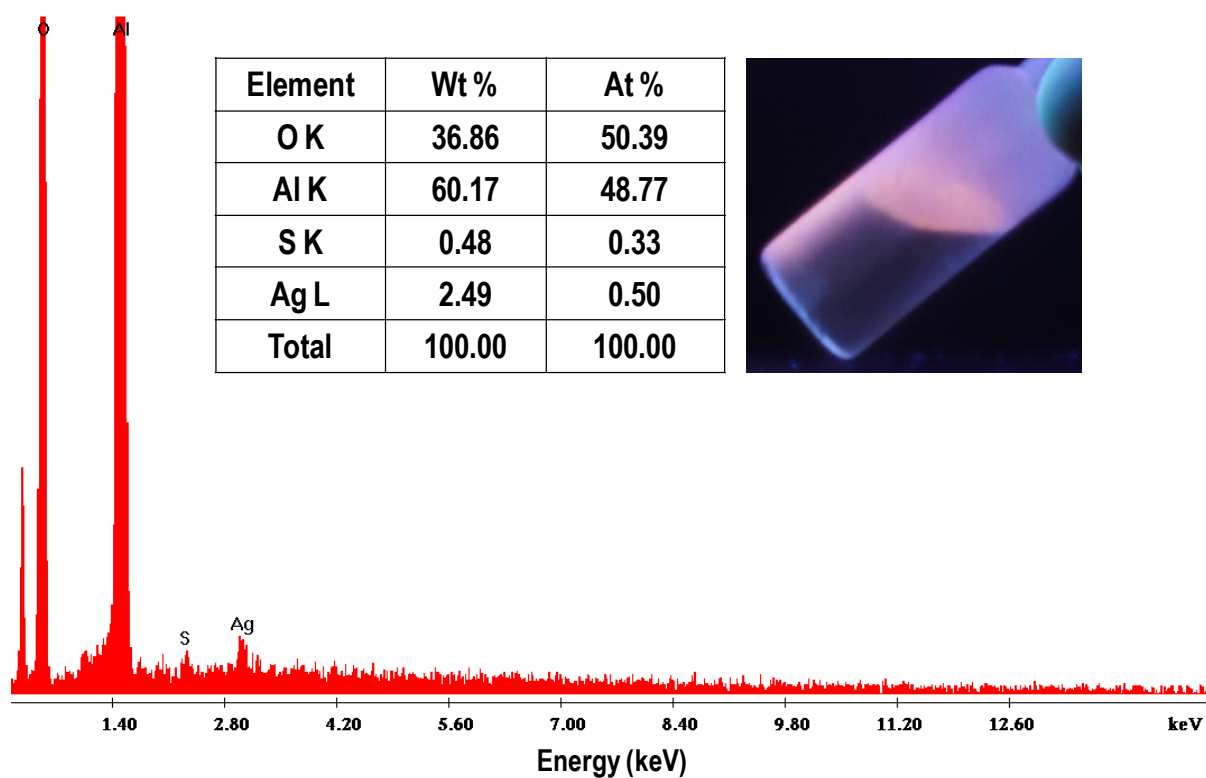

**Fig. S1** EDAX spectrum of supported  $\text{Ag}_9\text{MSA}_7$  clusters which confirms the presence of Ag and S from the cluster on alumina. Insets are the quantification table of elements and a photograph of supported  $\text{Ag}_9\text{MSA}_7$  clusters under UV lamp. Photograph was taken after dipping the sample bottle in liquid nitrogen. The blue scattered light around the glass bottle is due to scattering from condensed moisture. The emission of the cluster is red.

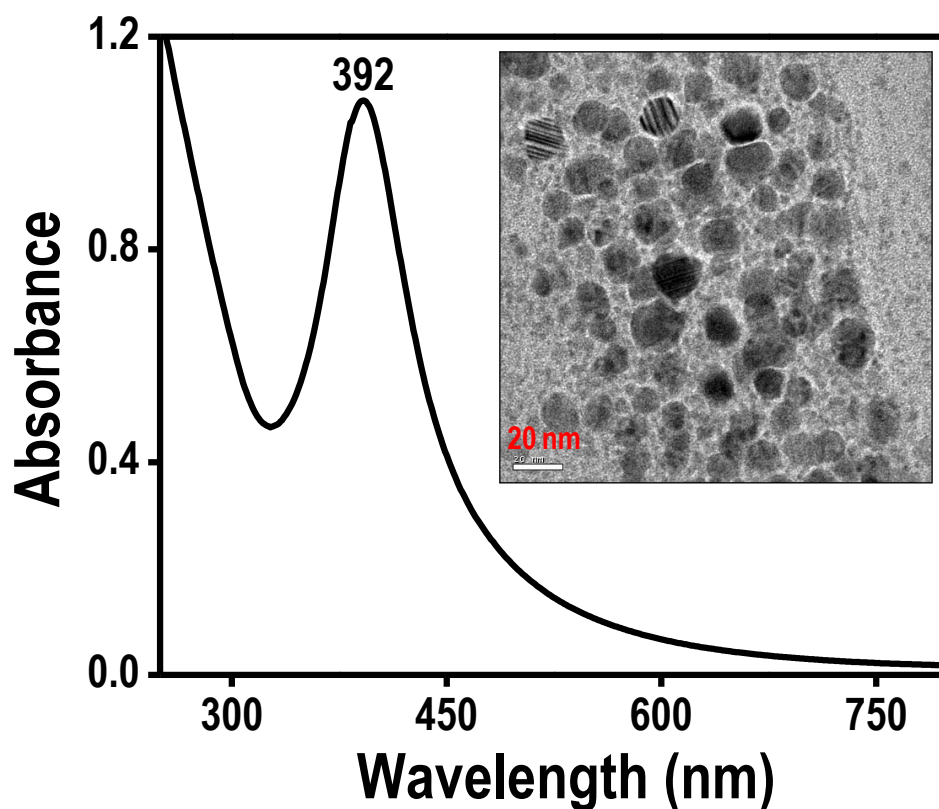

**Fig. S2** UV/Vis absorption spectrum of as-synthesized Ag@MSA nanoparticles. Inset is a TEM image of Ag@MSA nanoparticles.

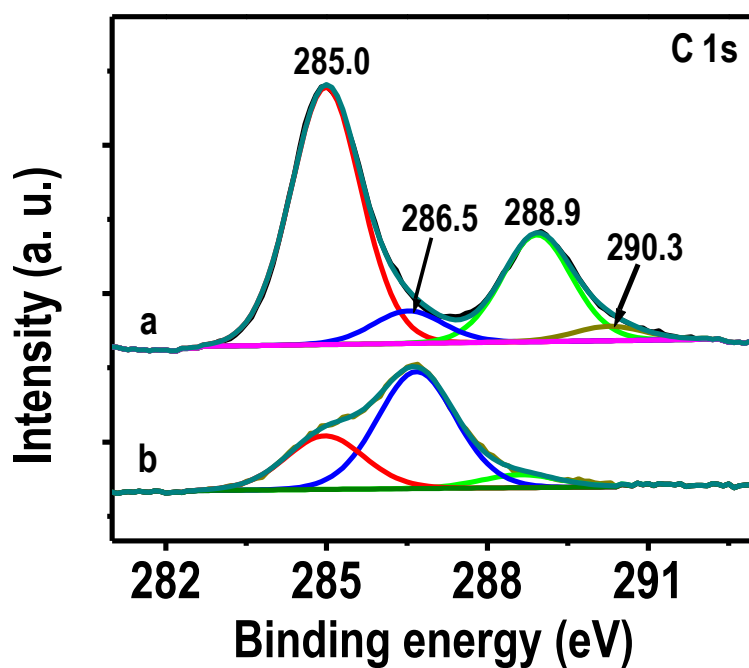

**Fig. S3** C 1s region of the XPS of parent Ag<sub>9</sub>MSA<sub>7</sub> clusters (a) and the product (b) obtained after the reaction of clusters with CCl<sub>4</sub>.

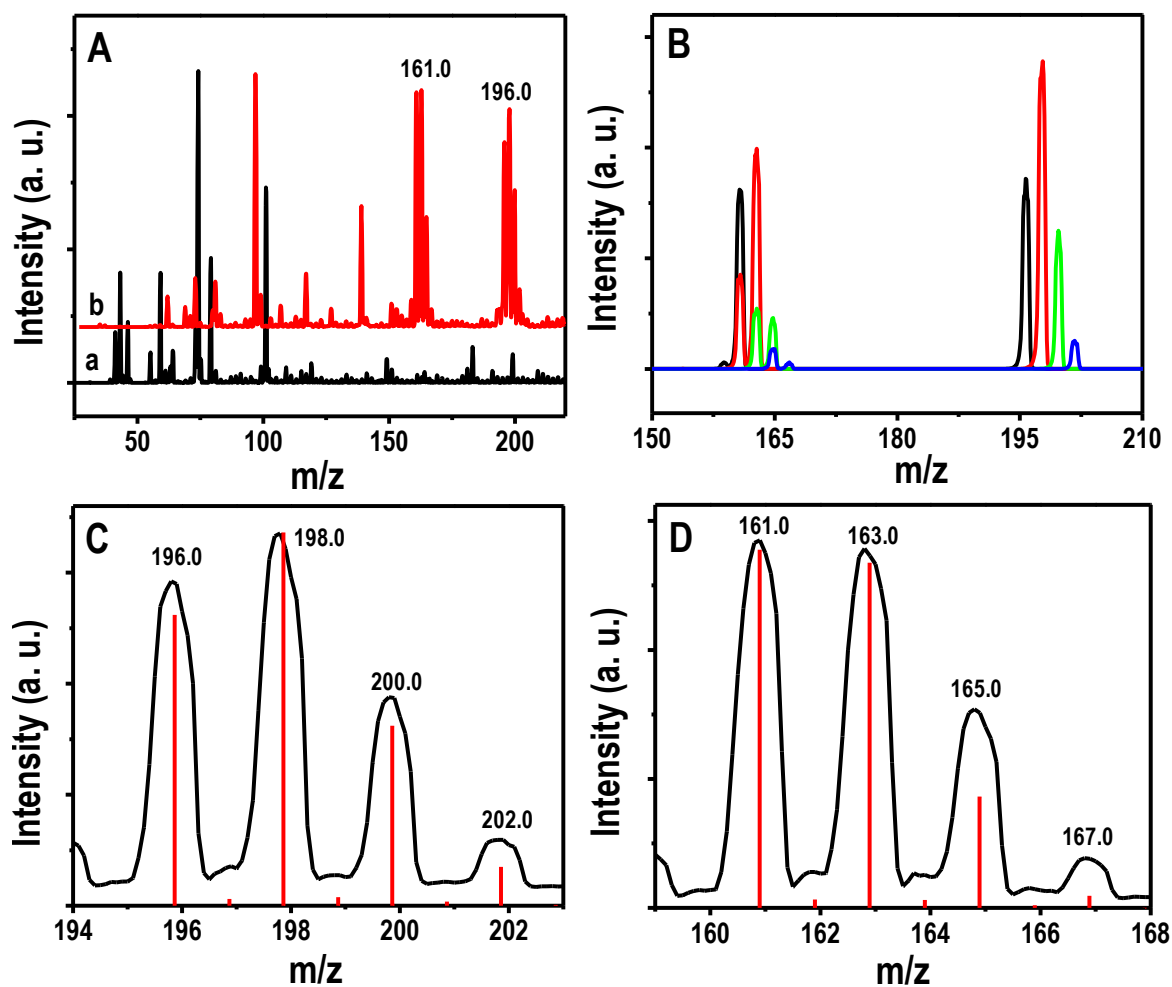

**Fig. S4** A) ESI MS of reaction mixture of  $\text{Ag}_9\text{MSA}_7$  and  $\text{CCl}_4$  in positive and negative modes (traces a and b, respectively). B is MS/MS of m/z 196.0, 198.0, 200.0 and 202.0 in negative mode. C and D are comparisons of experimental (black traces) and calculated spectra (red traces) for species  $\text{CCl}_4\text{COO}^-$  and  $\text{CCl}_3\text{COO}^-$ , respectively.

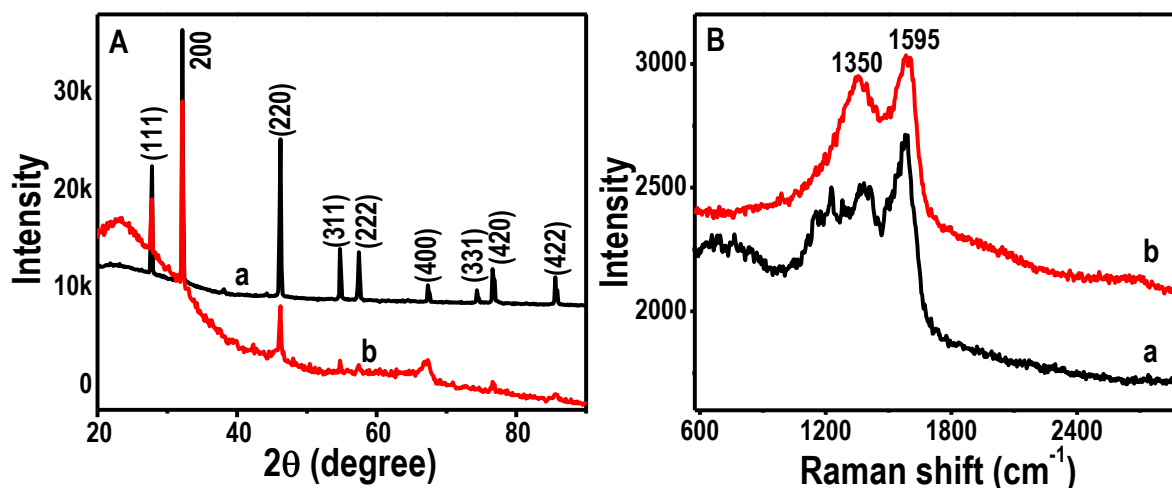

**Fig. S5** A) Comparison of XRD patterns of as-prepared AgCl (a) and reaction product (b) of  $\text{CCl}_4$  and supported clusters. B) Raman spectra of the reaction product of  $\text{CCl}_4$  and supported clusters before (a) and after (b) washing with ammonia solution.

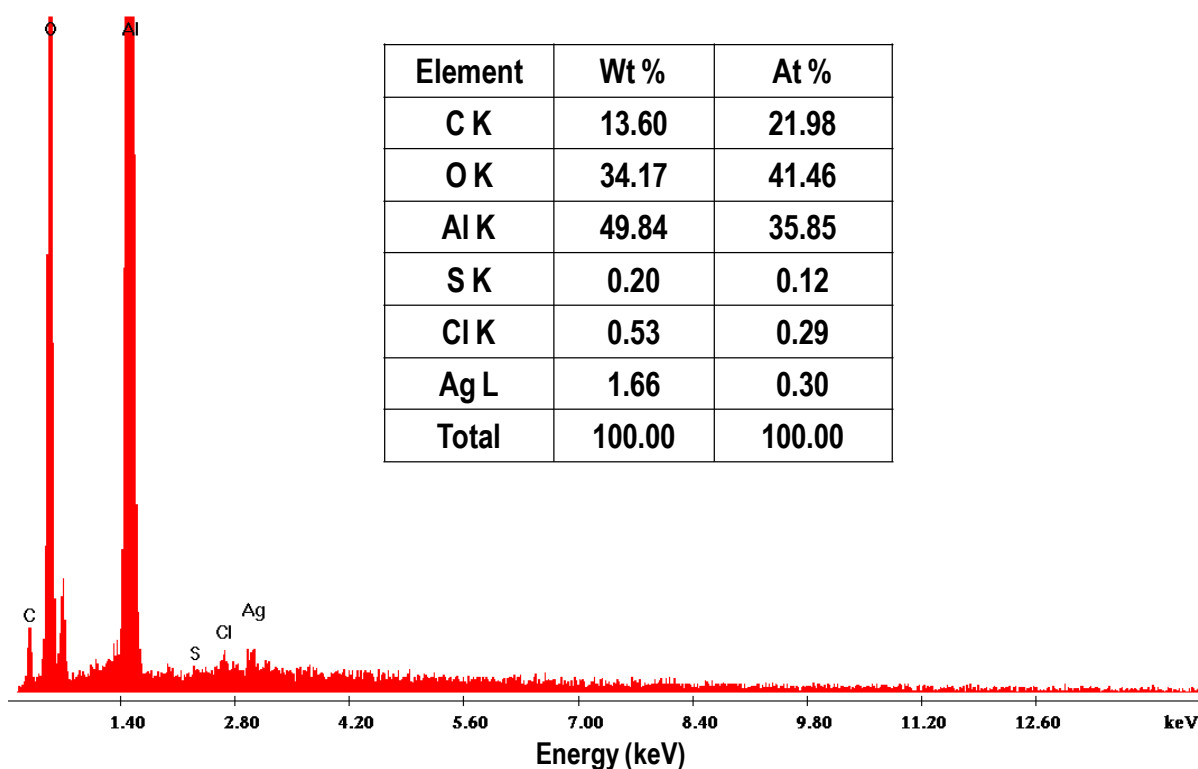

**Fig. S6** EDAX spectrum of the reaction product of  $\text{CCl}_4$  and supported clusters showing the presence of Cl, Ag and S. Inset is a quantification table of elements which shows that the atomic ratio of Ag to S is 1:1.
